# Supplementary material
Source: publisher site journal article supplement (https://www.dovepress.com/article/402506)
Supplement: Supplementary file 1 [file get_supplementary_file.php]

## **Appendix 1 Detailed Search Strategies**

### **Pubmed Search Strategies**

- #1 "pulmonary disease, chronic obstructive"[MeSH Terms]
- #2 "chronic obstructive lung disease"[Title/Abstract] OR "chronic obstructive pulmonary diseases"[Title/Abstract] OR "COAD"[Title/Abstract] OR "COPD"[Title/Abstract] OR "chronic obstructive airway disease"[Title/Abstract] OR "chronic obstructive pulmonary disease"[Title/Abstract] OR "airflow obstruction chronic"[Title/Abstract] OR "airflow obstructions chronic"[Title/Abstract] OR "chronic airflow obstructions"[Title/Abstract] OR "chronic airflow obstruction"[Title/Abstract]
- #3 #1 OR #2
- #4 "high flow oxygen"[Title/Abstract] OR "high flow nasal cannula"[Title/Abstract] OR "high flow nasal oxygen therapy"[Title/Abstract] OR "high flow nasal cannula oxygen therapy"[Title/Abstract] OR "high flow oxygen therapy"[Title/Abstract] OR "HFNC"[Title/Abstract] OR "HFOT"[Title/Abstract] OR "HFNOT"[Title/Abstract]
- #5 "random"[Title/Abstract] OR "randomly"[Title/Abstract] OR "randomized"[Title/Abstract]
- #6 #3 AND #4 AND #5

### **Embase Search Strategies**

- #1 'chronic obstructive lung disease'/exp
- #2 'chronic obstructive lung disease':ti,ab,kw OR 'chronic obstructive pulmonary diseases':ti,ab,kw OR coad:ti,ab,kw OR copd:ti,ab,kw OR 'chronic obstructive airway disease':ti,ab,kw OR 'chronic obstructive pulmonary disease':ti,ab,kw OR 'airflow obstruction, chronic':ti,ab,kw OR 'airflow obstructions, chronic':ti,ab,kw OR 'chronic airflow obstructions':ti,ab,kw OR 'chronic airflow obstruction':ti,ab,kw
- #3 #1 OR #2
- #4 'high flow oxygen':ti,ab,kw OR 'high-flow nasal cannula':ti,ab,kw OR 'high-flow nasal oxygen therapy':ti,ab,kw OR 'high-flow nasal cannula oxygen therapy':ti,ab,kw OR 'high flow oxygen therapy':ti,ab,kw OR 'hfnc':ti,ab,kw OR 'hfot':ti,ab,kw OR 'hfnot':ti,ab,kw
- #5 'random':ti,ab,kw OR 'randomly':ti,ab,kw OR 'randomized':ti,ab,kw
- #6 #3 AND #4 AND #5

### **the Cochrane Library Search Strategies**

- #1 Mesh descriptor: [Pulmonary Disease, Chronic Obstructive] explode all trees
- #2 (Chronic Obstructive Lung Disease):ti,ab,kw OR (Chronic Obstructive Pulmonary Diseases):ti,ab,kw OR (COAD):ti,ab,kw OR (COPD):ti,ab,kw OR (Chronic Obstructive Airway Disease):ti,ab,kw OR (Chronic Obstructive Pulmonary Disease):ti,ab,kw OR (Airflow Obstruction, Chronic):ti,ab,kw OR (Airflow Obstructions, Chronic):ti,ab,kw OR (Chronic Airflow Obstructions):ti,ab,kw OR (Chronic Airflow Obstruction):ti,ab,kw
- #3 #1 OR #2
- #4 (High Flow Oxygen):ti,ab,kw OR (High-Flow Nasal Cannula):ti,ab,kw OR (High-flow nasal oxygen therapy):ti,ab,kw OR (High-Flow Nasal Cannula Oxygen Therapy):ti,ab,kw OR (High flow oxygen therapy):ti,ab,kw OR (HFNC):ti,ab,kw OR (HFOT):ti,ab,kw OR (HFNOT):ti,ab,kw
- #5 (random):ti,ab,kw OR (randomly):ti,ab,kw OR (randomized):ti,ab,kw
- #6 #3 AND #4 AND #5

**Table s1** Summary of Patient Comfort

| Study                       | Evaluation tools             | HFNC group     | COT group     | P value | Conclusion |
|-----------------------------|------------------------------|----------------|---------------|---------|------------|
| Li 2020 <sup>4</sup>        | Subjective discomfort score  | 2.3±1.1        | 3.9±1.6       | <0.001  | Favor HFNC |
| Longhini 2019 <sup>13</sup> | Comfort Numeric Rating Scale | 9.0 (8.0–10.0) | 7.0 (5.0–8.0) | <0.001  | Favor HFNC |
| Xia 2022 <sup>14</sup>      | Mouth dryness score          | 3.0(1.0-4.0)   | 2.0 (1.0-4.0) | 0.717   | Similar    |
|                             | Nasal dryness score          | 2.0 (1.0-4.0)  | 2.0 (1.0-4.0) | 0.734   | Similar    |
|                             | Throat dryness score         | 2.0 (1.0-4.0)  | 2.0 (1.0-4.0) | 0.888   | Similar    |

**Notes:** Data are presented as mean ± standard deviation or median (interquartile range).

**Abbreviations:** HFNC, high-flow nasal cannula; COT, conventional oxygen therapy.
